# Supplementary material
Source: Springer Nature journal article supplement (https://www.springermedizin.de/resource/supplementary/12931_2010_1031_MOESM2_ESM.pdf/9425598)
Supplement: MOESM2 [file 9425598]

3236 studies retrieved from initial Medline and Embase database search

2604 excluded after title review

632 abstracts reviewed

500 excluded after abstract review

132 full texts reviewed

103 excluded after full text review

**29** studies included in updated meta-analysis

**31** studies included from Strachan and Cook Review

**60** studies included in updated meta-analysis
